# Supplementary material for: Two-year cost effectiveness between two gradual tapering strategies in rheumatoid arthritis: cost-utility analysis of the TARA trial
Source: PubMed Central journal article supplement — Ann Rheum Dis. 2020 Sep 9;79(12):1550–6. doi: 10.1136/annrheumdis-2020-217528 (PMC7677489; doi:10.1136/annrheumdis-2020-217528), 2020-09-09
Supplement: annrheumdis-2020-217528supp001.pdf [file annrheumdis-2020-217528supp001.pdf]

## Supplementary files

Supplementary table S1 Costs of medication <sup>1</sup>

|                           | Calculation base | Costs    |
|---------------------------|------------------|----------|
| <b>DMARDs</b>             |                  |          |
| Methotrexate              |                  |          |
| • Oral                    | 2.5mg tablet     | €0.18    |
| • Subcutaneous            |                  |          |
| ○ 2.5 tot 10 mg           | per piece        | €13.72   |
| ○ 12.5 tot 20 mg          | per piece        | €27.45   |
| ○ 22.5 tot 25 mg          | per piece        | €34.31   |
| Sulfasalazine (oral)      | 500mg tablet     | €0.11    |
| Hydroxychloroquine (oral) | 200mg tablet     | €0.14    |
| Leflunomide (oral)        |                  |          |
| • 20 mg tablet            | per piece        | €1.48    |
| • 10 mg tablet            | per piece        | €1.14    |
| <b>Glucocorticoids</b>    |                  |          |
| Prednisone (oral)         |                  |          |
| • Oral                    | 5mg tablet       | €0.05    |
| Triamcinolone (im)        | 80mg             | €6.72    |
| Methylprednisolone (im)   | 120mg            | €6.74    |
| <b>Biologicals</b>        |                  |          |
| Etanercept (sc)           |                  |          |
| • 25 mg                   | per piece        | €105.63  |
| • 50 mg                   | per piece        | €211.25  |
| Adalimumab (sc)           |                  |          |
| • 20 mg                   | per piece        | €269.22  |
| • 40 mg                   | per piece        | €538.44  |
| Certolizumab (sc)         |                  |          |
| • 200 mg                  | per piece        | €505.77  |
| Golimumab (sc)            |                  |          |
| • 50 mg                   | per piece        | €1125.84 |
| Abatacept (sc)            |                  |          |
| • 125 mg                  | per piece        | €277.95  |

**Supplementary table S2 Reference prices for medical consumption<sup>2</sup>**

|                               | Reference price |
|-------------------------------|-----------------|
| <b>Standard healthcare</b>    |                 |
| Inpatient day                 |                 |
| • General hospital (day)      | €461            |
| • University hospital (day)   | €668            |
| Intensive care unit (day)     | €1234           |
| Daycare treatment (day)       | €495            |
| Outpatient visit              |                 |
| • Specialist                  |                 |
| ○ General hospital            | €83             |
| ○ University hospital         | €170            |
| Emergency room visit          | €269            |
| Primary care physician        | €34             |
| Paramedical care              |                 |
| • Physical therapy            | €34             |
| • Occupational therapy        | €34             |
| • Speech therapy              | €31             |
| • Dietary advice (hour)       | €31             |
| Mental healthcare             |                 |
| • Social worker               | €68             |
| • Psychologist                | €67             |
| <b>Complementary medicine</b> |                 |
| Alternative medical systems   |                 |
| • Homeopathic treatment       | €31             |

**Supplementary table S3 Average hourly productivity costs, stratified for age and sex**<sup>3,4</sup>

| Age (years) | Men     | Women   |
|-------------|---------|---------|
| 15 to 19    | € 8.77  | € 7.97  |
| 20 to 24    | € 16.56 | € 16.13 |
| 25 to 29    | € 22.53 | € 23.12 |
| 30 to 35    | € 28.14 | € 27.81 |
| 35 to 40    | € 33.91 | € 30.62 |
| 40 to 45    | € 39.13 | € 30.87 |
| 45 to 50    | € 42.61 | € 29.67 |
| 50 to 55    | € 44.13 | € 28.75 |
| 55 to 60    | € 44.48 | € 28.68 |
| 60 to 65    | € 43.34 | € 28.83 |

**Supplemental table S4 Comparison of imputed data versus complete cases**

|                                                         | Complete cases | Imputed dataset | Difference        | P value |
|---------------------------------------------------------|----------------|-----------------|-------------------|---------|
| EQ5D, mean (sd)                                         | 0.83 (0.16)    | 0.83 (0.15)     | 0.002 (0.0053)    | 0.69    |
| Paid work, proportion (se)                              | 0.506 (0.0019) | 0.506 (0.0019)  | 0.0002 (0.0027)   | 0.94    |
| LOG days with productivity loss, mean (sd)              | 1.80 (0.82)    | 1.80 (0.81)     | 0.000027 (0.0066) | 1       |
| Productivity score, mean (sd)                           | 7.63 (1.81)    | 7.63 (1.81)     | 0.000000070       | 1       |
| LOG number of times absent due to sick leave, mean (sd) | 0.26 (0.53)    | 0.26 (0.53)     | 0.00000067        | 1       |
| Duration of sick leave, mean (sd)                       | 2.94 (2.49)    | 2.94 (2.49)     | 0.00070           | 0.97    |
| Working hours per week, mean (sd)                       | 30.3 (11.8)    | 30.3 (11.7)     | 0.0015            | 0.99    |

EQ5D: EuroQol with 5 dimensions; sd: standard deviation

**REFERENCES**

1. Zorginstituut Nederland. Medicijnkosten. 2019. <http://www.medicijnkosten.nl> (accessed 18-08-2019 2019).
2. Hakkaart-van Roijen L, Van der Linden N, Bouwmans CAM, Kanters TA, SS. T. Kostenhandleiding. Methodologie van kostenonderzoek en referentieprijzen voor economische evaluaties in de gezondheidszorg. 2015.
3. Statline C. Beloning en arbeidsvolume van werknemers. 2019. <https://opendata.cbs.nl/statline/#/CBS/nl/dataset/84165NED/table?dl=217EE&ts=1566303305202> (accessed 01-06-2019 2019).
4. Statline C. Beloningsverschillen tussen mannen en vrouwen. 2019. <https://opendata.cbs.nl/statline/#/CBS/nl/dataset/81901NED/table?dl=217EC> (accessed 01-06-2019 2019).
