# Supplementary material for: Two-year cost effectiveness between two gradual tapering strategies in rheumatoid arthritis: cost-utility analysis of the TARA trial
Source: PubMed Central journal article supplement — Ann Rheum Dis. 2020 Sep 9;79(12):1550–6. doi: 10.1136/annrheumdis-2020-217528 (PMC7677489; doi:10.1136/annrheumdis-2020-217528), 2020-09-09
Supplement: annrheumdis-2020-217528supp002.pdf [file annrheumdis-2020-217528supp002.pdf]

## Mean incremental net monetary benefit

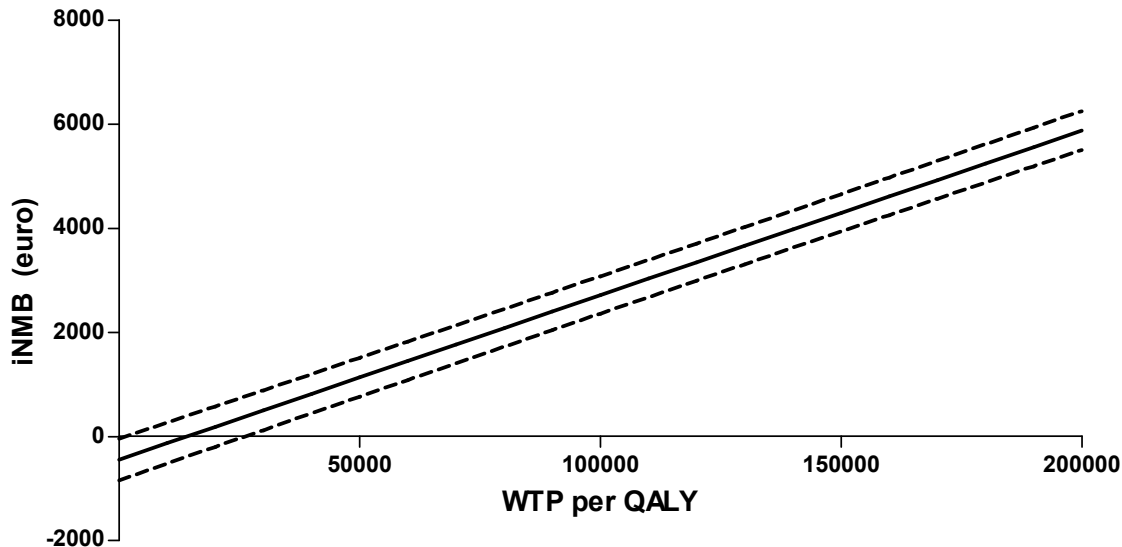

**Figure S1 Mean incremental net monetary benefit (iNMB) for tapering csDMARDs minus tapering TNF-inhibitors first.** Results are plotted against different levels of willingness to pay (WTP) per quality adjusted life year (QALY), and with 95% confidence intervals. The iNMB was calculated as the incremental benefit times different levels of WTP, minus the incremental costs. csDMARDs: conventional synthetic DMARDs; iNMB: incremental net monetary benefit; QALY: quality adjusted life year; WTP: willingness to pay.
