# Supplementary material for: Two-year cost effectiveness between two gradual tapering strategies in rheumatoid arthritis: cost-utility analysis of the TARA trial
Source: PubMed Central journal article supplement — Ann Rheum Dis. 2020 Sep 9;79(12):1550–6. doi: 10.1136/annrheumdis-2020-217528 (PMC7677489; doi:10.1136/annrheumdis-2020-217528), 2020-09-09
Supplement: annrheumdis-2020-217528supp003.pdf [file annrheumdis-2020-217528supp003.pdf]

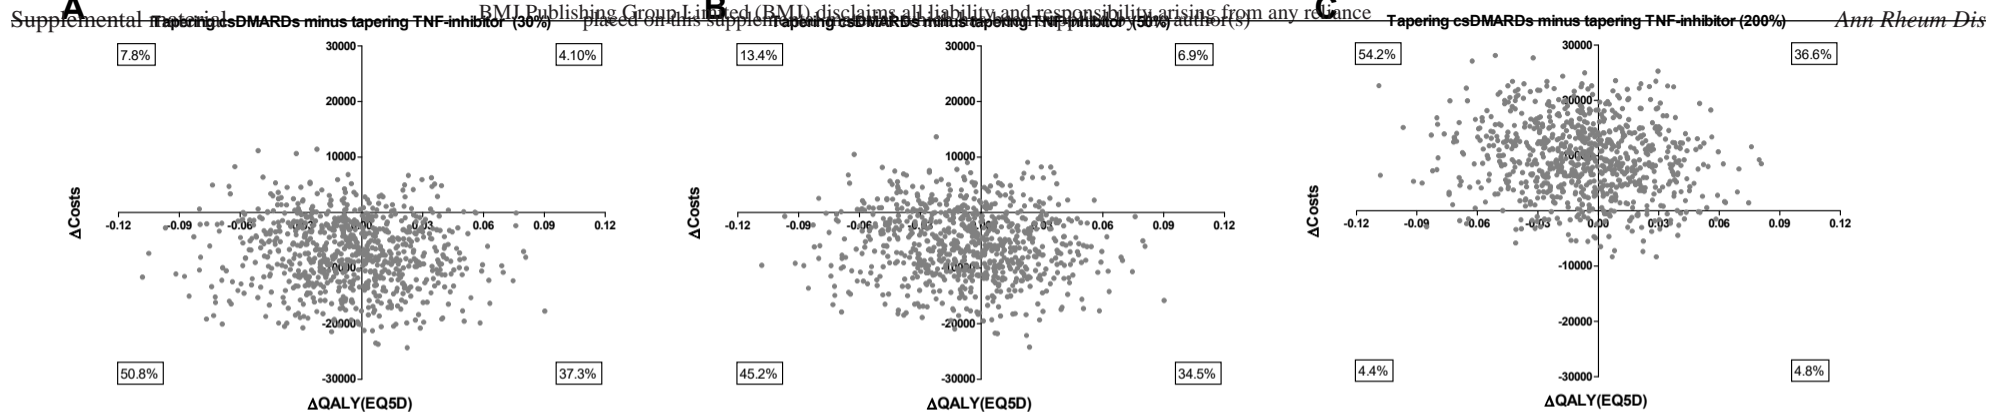

**Figure S2 Cost-effectiveness planes with results of sensitivity analyses to investigate biological price changes.**

(A) 30%, (B) 50%, and (C) 200% of original biological prices were taken to investigate the effect of price changes.
